# Supplementary material
Source: PubMed Central journal article supplement (PMC3133279)
Supplement: supp_193_13_3265__1.pdf [file supp_193_13_3265__1.pdf]

## Supplemental Results.

**ChiA:** Homologues of *F. novicida chiA* were identified in *F. tularensis* A1a, A1b, A2 and type B. The *F. tularensis* A1a/A1b and type B, and *F. novicida chiA* genes were predicted to encode proteins of 760, 760 and 870 aa, respectively (Fig. 2A). The *F. tularensis* A2 *chiA* gene is annotated as a pseudogene and is predicted to encode a truncated product of 198 aa (2). All the predicted intact ChiA proteins contained a full length GH18 domain (PfamID: PF00704). Three accessory domains, fibronectin type 3 domain (Pfam ID: PF00041) and two tandem carbohydrate binding domains (PfamID: PF02839), were identified in the ChiA sequences of *F. tularensis* A1a/A1b and type B, and *F. novicida*. The *F. novicida* ChiA, however, possessed a third carbohydrate binding domain that partially accounts for its larger size. All accessory domains are located C-terminal to the GH18 domain. All *chiA* gene products were predicted to possess a N-terminal signal peptide suggesting they are translocated across the cytoplasmic membrane.

**ChiB:** The genomes of *F. tularensis* A1a, A1b and type B, and *F. novicida* possessed the *chiB* gene encoding chitinases of 606, 730 and 730 aa, respectively, and that contained an intact GH18 domain. *F. tularensis* A2 displayed an altered *chiB* gene resulting in a product with a 566 aa truncation that accounts for the absence of the GH18 domain (Fig. 2B). A partial N-acetylglucosamine-binding protein A domain (conserved domain (cdd) ID: PRK13211) was identified at the N-terminus of all predicted ChiB proteins except that of the *F. tularensis* A1a/A1b where a 124 aa N-terminal truncation occurs. This truncation also encompassed the signal peptide conserved in the other ChiB sequences of *F. tularensis* A2 and type B, and *F. novicida*.

**ChiC:** The third chitinase (ChiC) identified in *F. tularensis* A1a/1b, A2, type B, and *F. novicida* differed significantly when compared across the subtypes. The *F. tularensis* A2 and *F. novicida* strain GA99-3548 *chiC* genes encode a predicted full length products of 762 aa. The *F. tularensis* type B ChiC contained a C-terminal truncation of 58 aa that impacts the GH18 domain. Most interestingly, the *F. tularensis* A1a/A1b *chiC* gene possessed a point mutation that causing a premature stop codon and two predicted open reading frames. In *F. tularensis* A1a these two reading frames were annotated as FTT\_1592c and FTT\_1593c and encode products of 387 and 207 aa, respectively. The *F. tularensis* A1a FTT\_1592c open reading frame encodes for the C-terminal portion of ChiC that includes a complete GH18 domain (Fig. 2C). The ChiC proteins also possess two tandem carbohydrate binding domains (PfamID: PF02839). The position of these domains is directly after the N-terminal signal sequence, a location that is in sharp contrast to those of the ChiA proteins.

**ChiD:** ChiD was highly conserved among all *Francisella* spp. and subtypes (Fig. 2D). All were predicted to contain a full length C-terminal GH18 domain, and an incomplete second GH18 domain. A partial *N*-acetylglucosamine-binding protein A domain was also predicted at the C-terminus. It should be noted that the shotgun genome sequence used by others to assemble the *F. tularensis* A1b genome found several alterations in *chiD*, including a mutation leading to a premature stop codon. However, our conventional sequencing of *chiD* amplified by PCR from *F. tularensis* A1b strain MA00-2987 found it to be identical to the *F. tularensis* A1a *chiD*.

TABLE S1. Primers used to generate histidine tagged chitinase recombinants

| Chitinase class | Loci <sup>a</sup> | Amplicon size | Forward primer (5'-3') <sup>b</sup>                  | Reverse Primer (5'-3') <sup>b</sup>           |
|-----------------|-------------------|---------------|------------------------------------------------------|-----------------------------------------------|
| ChiA            | FTT_0715          | 2292          | <u>GCT AGC</u> ATG AAC AAA ACA AAA TTA GTC TCA GTA G | <u>GTC GAC</u> TTG TTT TTC CCA AAC ATT AC     |
|                 | FTH_1471          | 2292          | <u>GCT AGC</u> ATG AAC AAA ACA AAA TTA GTC TCA GTA G | <u>GTC GAC</u> TTG TTT TTC CCA AAC ATT AC     |
|                 | FTN_0627          | 2622          | <u>GCT AGC</u> ATG AAC AAA ACA AAA TTA               | <u>GTC GAC</u> TTG TTT TTC CCA AAC            |
| ChiB            | FTT_1768c         | 1830          | <u>GCT AGC</u> ATG CCA TAT TCT GAT ACC C             | <u>CTC GAG</u> TTT ATC ATT TAT AGG ATA A      |
|                 | FTH_0088          | 2202          | <u>GCT AGC</u> ATG AAA TAC AAA AAG TTA TTA           | <u>CTC GAG</u> TTT ATC ATT TAT AGG ATA A      |
|                 | FTN_1744          | 2202          | <u>GCT AGC</u> ATG AAA TAC AAA AAG TTA TT            | <u>CTC GAG</u> TTT ATC ATT TAT AGG ATA AA     |
| ChiC            | FTT_1592c         | 1173          | <u>ACT AGT</u> GTG ACT GGA TAT AAA GCT ATC           | <u>CTC GAG</u> TTT AGA AGT ATA CTT TTC TTG AG |
|                 | FTW_0313          | 2298          | <u>ACT AGT</u> ATG AAA AAA ATG AAA TTA ATC TCA TC    | <u>CTC GAG</u> TTT AGA AGT ATA CTT TTC TTG AG |
|                 | FTH_1579          | 2049          | <u>ACT AGT</u> ACT ACT ATT AAA TCA GCA TCA TC        | <u>CTC GAG</u> TCG ACT TCC ATG CC             |
| ChiD            | FTT_0066          | 2853          | <u>GCT AGC</u> ATG AGA AAA CTT TTT ATA A             | <u>CTC GAG</u> TTT ACT ATC TAT TTT TGT CCA    |
|                 | FTT_0142          | 2853          | <u>GCT AGC</u> ATG AGA AAA CTT TTT ATA A             | <u>CTC GAG</u> TTT ACT ATC TAT TTT TGT CCA    |
|                 | FTT_1730          | 2853          | <u>GCT AGC</u> ATG AGA AAA CTT TTT ATA A             | <u>CTC GAG</u> TTT ACT ATC TAT TTT TGT CCA    |
|                 | FTN_1644          | 2853          | <u>GCT AGC</u> ATG AGA AAA CTT TTT ATA A             | <u>CTC GAG</u> TTT ACT ATC TAT TTT TGT CCA    |

<sup>a</sup>FTT corresponds to A1a/A1b strains; FTW corresponds to A2 strains; FTH corresponds to type B strains; FTN corresponds to *F. novicida* strains.

<sup>b</sup>The *NheI* (GCT AGC), *SpeI* (ACT AGT), *SalI* (GTC GAC) and *XhoI* (CTC GAG) restriction sites are underlined.

TABLE S2. Plasmids used in this study

| Plasmid <sup>a</sup>                         | Description                                              | Source      |
|----------------------------------------------|----------------------------------------------------------|-------------|
| pCR <sup>®</sup> -Blunt II-TOPO <sup>®</sup> | Km <sup>R</sup> , Zeo <sup>R</sup> , cloning vector      | Invitrogen  |
| pET23b-(+)                                   | Ap <sup>R</sup> , Histidine tagged, expression vector    | Novagen     |
| pET23b-(+)_FTT_0715                          | A1a/A1b <i>chiA</i> expression vector                    | This study  |
| pET23b-(+)_FTH_1471                          | type B <i>chiA</i> expression vector                     | This study  |
| pET23b-(+)_FTN_0627                          | <i>F. novicida chiA</i> expression vector                | This study  |
| pET23b-(+)_FTT_1768c                         | A1a/A1b <i>chiB</i> expression vector                    | This study  |
| pET23b-(+)_FTH_0088                          | type B <i>chiB</i> expression vector                     | This study  |
| pET23b-(+)_FTN_1744                          | <i>F. novicida chiB</i> expression vector                | This study  |
| pET23b-(+)_FTT_1592c                         | A1a/A1b <i>chiC</i> (GH18 fragment) expression vector    | This study  |
| pET23b-(+)_FTW_0313                          | A2 <i>chiC</i> expression vector                         | This study  |
| pET23b-(+)_FTH_1579 <sup>b</sup>             | type B <i>chiC</i> (no signal peptide) expression vector | This study  |
| pET23b-(+)_FTT_0066                          | A1a/A1b <i>chiD</i> expression vector                    | This study  |
| pET23b-(+)_FTW_0142                          | A2 <i>chiD</i> expression vector                         | This study  |
| pET23b-(+)_FTH_1730                          | type B <i>chiD</i> expression vector                     | This study  |
| pET23b-(+)_FTN_1644                          | <i>F. novicida chiD</i> expression vector                | This study  |
| pMP590                                       | <i>sacB</i> -based allelic exchange vector               | LoVullo(25) |
| pMP529                                       | <i>Francisella</i> shuttle/integration vector            | LoVullo(25) |
| pMP590- $\Delta$ <i>chiA</i>                 | allelic exchange vector for <i>chiA</i> knockout         | This study  |
| pMP590- $\Delta$ <i>chiC</i>                 | allelic exchange vector for <i>chiC</i> knockout         | This study  |
| pMP529- <i>chiA</i>                          | <i>chiA</i> integration vector                           | This study  |
| pMP529- <i>chiC</i>                          | <i>chiC</i> integration vector                           | This study  |

<sup>a</sup> FTT, FTW, FTH and FTN loci correspond to those listed in Supplementary Table 1.

<sup>b</sup> Attempts to produce protein with the signal peptide failed.

TABLE S3. Internal sequencing primers (5'-3')

| Loci      | Primer 1                          | Primer 2                                | Primer 3                           | Primer 4                           |
|-----------|-----------------------------------|-----------------------------------------|------------------------------------|------------------------------------|
| FTT_0715  | GTA TGG AAA ACT TTG CTA AGC AGT   | GTT GCA TTG CTA CTT TAC CGT ACT TGT TAA | -                                  | -                                  |
| FTH_1471  | GTA TGG AAA ACT TTG CTA AGC AGT   | GTT GCA TTG CTA CTT TAC CGT ACT TGT TAA | -                                  | -                                  |
| FTN_0627  | GTA TGG AAA ACT TTG CTA AGC AGT   | GTT GCA TTG CTA CTT TAC CGT ACT TGT TAA | CGC TAG ATC AAT GAC TGT AGC TAG TG | -                                  |
| FTT_1768c | GAG CCT ATA ACT TTA GGC AAG GG    | GAT AAA GTT GCA GGA CCA CTT CT          | TTT ACG AAA CAC GGA AAC CGA A      | -                                  |
| FTH_0088  | GAG CCT ATA ACT TTA GGC AAG GG    | GGG TGA GTT TAC AAT TAA GCC AG          | -                                  | -                                  |
| FTN_1744  | GGG TGA GTT TAC AAT TAA GCC AG    | ACA ACT GGC TTA CCT CAA ACT AT          | -                                  | -                                  |
| FTT_1592c | -                                 | -                                       | -                                  | -                                  |
| FTT_1593c | -                                 | -                                       | -                                  | -                                  |
| FTW_0313  | GTT ATT GCT GAA GTG AAA GAT GCT A | AGC AAC AGT CTC GCC AGC TGA G           | GAC GTT AGA TGG TTC ACC AAA TCC T  | CTG CAG AAG ATG TGG CTC CTT AC     |
| FTH_1579  | GTT ATT GCT GAA GTG AAA GAT GCT A | GAC GTT AGA TGG TTC ACC AAA TCC T       | -                                  | -                                  |
| FTT_0066  | TAA TTG CTG CTG AAC CAG AAG T     | CAT GGG CCA GTT GTT GCT GG              | GTA GTT CTG ATA TGC CTA AGA ATG AT | GGA TAC ATT CCA AAT GGA CTA TAT GG |
| FTW_0142  | TAA TTG CTG CTG AAC CAG AAG T     | CAT GGG CCA GTT GTT GCT GG              | GTA GTT CTG ATA TGC CTA AGA ATG AT | GGA TAC ATT CCA AAT GGA CTA TAT GG |
| FTH_1730  | TAA TTG CTG CTG AAC CAG AAG T     | CAT GGG CCA GTT GTT GCT GG              | GTA GTT CTG ATA TGC CTA AGA ATG AT | GGA TAC ATT CCA AAT GGA CTA TAT GG |
| FTN_1644  | TAA TTG CTG CTG AAC CAG AAG T     | CAT GGG CCA GTT GTT GCT GG              | GTA GTT CTG ATA TGC CTA AGA ATG AT | GGA TAC ATT CCA AAT GGA CTA TAT GG |

TABLE S4. Primers used for constructing knockouts and complemented knockouts

| Construct                                 | Fragment amplified     | Amplicon size (bp) | Forward primer (5'-3') <sup>b</sup>               | Reverse Primer (5'-3') <sup>b</sup>           |
|-------------------------------------------|------------------------|--------------------|---------------------------------------------------|-----------------------------------------------|
| pMP590- $\Delta$ <i>chiA</i>              | <i>chiA</i> upstream   | 562                | TTT GAC TAA <u>GGA TCC</u> ATA TTA AC             | TCT AGC <u>AGT CGA</u> CAT GAT CC             |
|                                           | <i>chiA</i> downstream | 941                | AAG TAG <u>CTG CAG</u> ACC AAG GC                 | AGT TAG <u>GAT CCA</u> ATT ACT AAT AG         |
| pMP590- $\Delta$ <i>chiC</i> <sup>a</sup> | <i>chiC</i> upstream   | 477                | ATG AGT <u>ACG CGT</u> ATG ATG CTG                | ATC CTC <u>GTC GAC</u> AAC ACG G              |
|                                           | <i>chiC</i> downstream | 608                | TAA CAC <u>AGT CGA</u> CAT TTA TGG                | AGG AAA <u>CGC GTC</u> ATA CTA TC             |
| pMP529- <i>chiA</i>                       | <i>chiA</i>            | 2918               | AAT <u>ACG CGT</u> TCA TGT GAG CTC CTT TAA GC     | TAT <u>ACG CGT</u> TAT CTT CAT AAA TTA TGC GC |
| pMP529- <i>chiC</i> <sup>a</sup>          | <i>chiC</i>            | 2298               | <u>ACG CGT</u> ATG AAA AAA ATG AAA TTA ATC TCA TC | <u>ACG CGT</u> TTT AGA AGT ATA CTT TTC TTG AG |

<sup>a</sup>Primers designed using complement sequence.

<sup>b</sup>The *Bam*HI (GGA TCC), *Sal*I (GTC GAC), *Pst*I (CTG CAG) and *Mlu*I (ACG CGT) restriction sites are underlined.
